# Supplementary material for: Using a golf specific functional movement screen to predict golf performance in collegiate golfers
Source: PeerJ. 2024 May 24;12:e17411. doi: 10.7717/peerj.17411 (PMC11129693; doi:10.7717/peerj.17411)
Supplement: Supplemental Information 1 [file peerj-12-17411-s001.xlsx]

## Sheet: Sheet1
No.	Sex	age	height	weight	1yard putt	10 yard putt	25yard chip	130/100yard set shot	driving carry	total individual project	one round of 9-hole stroke play	total skills	PT	PR	TR	ODS	TT	90/90	SLB	LT	LQR	STR	BWLE	CR	FR	WH	WF	WE	GSFMS
1	M	22	180	73	10	8	9.6	9.6	9.8	47	28	75	1	2	1	3	1	4	0	2	4	2	0	1	2	2	2	2	29
2	M	20	178	70	10	8	8	9	9.8	44.8	28	72.8	2	2	1	3	0	4	0	2	4	1	1	0	0	2	0	0	22
3	F	19	166	60	10	6	7.4	9.8	10	43.2	28	71.2	2	2	1	3	1	2	0	2	4	2	0	2	2	2	0	0	25
4	M	21	178	70	10	8	7.4	9.2	8	42.6	28	70.6	2	2	1	3	1	4	0	2	4	2	1	2	1	2	2	2	31
5	M	21	172	75	10	10	8	8.8	7.8	44.6	26	70.6	2	2	1	3	0	2	0	2	4	1	0	2	2	2	0	0	23
6	M	21	179	71	10	10	8	9	9	46	24	70	2	2	1	3	1	0	0	2	4	2	1	1	0	2	0	0	21
7	M	22	170	73	10	10	9.4	8.4	6.6	44.4	24	68.4	2	2	1	3	1	4	0	2	4	0	0	2	2	2	0	0	25
8	F	20	160	59	8	10	7.6	9.4	5.2	40.2	28	68.2	2	2	1	2	1	2	0	2	4	2	1	2	2	2	2	2	29
9	M	22	170	56	10	10	8	8.8	7.2	44	24	68	1	2	1	3	1	4	0	0	4	1	2	0	0	2	0	0	21
10	M	21	180	73	10	8	7.2	9.8	6.8	41.8	26	67.8	2	2	1	3	1	0	1	2	4	0	1	2	2	2	2	2	27
11	M	21	175	72	10	10	7.6	9	5.4	42	25	67	2	1	1	3	1	4	1	2	4	2	2	2	2	2	2	2	33
12	M	21	173	68	10	8	8.2	8.2	8.6	43	24	67	2	2	1	3	1	4	0	2	4	2	0	2	2	2	0	0	27
13	M	22	175	80	10	10	7.6	6.6	6.6	40.8	26	66.8	2	2	1	1	0	4	0	2	4	2	0	2	2	2	0	0	24
14	M	22	180	64	8	8	7.8	9.4	7.4	40.6	26	66.6	3	2	1	3	1	2	0	2	4	2	2	2	1	2	2	2	31
15	M	22	172	61	10	8	5.2	8.4	8.8	40.4	26	66.4	2	0	1	3	1	0	0	2	4	0	1	2	2	2	2	2	24
16	M	21	177	72	10	10	5.6	8.4	7.6	41.6	24	65.6	2	2	1	3	0	2	1	2	4	1	0	2	2	2	0	0	24
17	F	22	162	55	8	8	6	9.6	7.8	39.4	26	65.4	2	2	1	3	1	4	0	2	4	2	0	2	2	2	2	2	31
18	M	20	180	77	10	10	6	8.8	5.8	40.6	24	64.6	2	2	1	3	1	2	1	2	4	2	1	2	0	2	0	0	25
19	M	21	176	70	10	8	7	10	5.6	40.6	24	64.6	2	2	0	3	1	4	0	2	2	2	0	2	2	2	2	2	28
20	F	21	164	62	10	8	7.6	8	4.8	38.4	26	64.4	2	2	1	3	1	0	1	2	4	2	0	0	2	2	2	2	26
21	M	23	182	66	10	10	3.4	9.6	7.2	40.2	24	64.2	2	2	1	2	1	2	1	2	4	2	1	1	2	2	2	2	29
22	M	21	178	70	10	10	3.4	9.6	7.2	40.2	24	64.2	2	2	1	2	1	0	0	2	4	2	0	2	2	2	2	2	26
23	M	22	174	65	10	10	4.6	9	6.6	40.2	24	64.2	1	2	1	1	1	0	0	2	4	2	0	2	0	2	0	0	18
24	M	21	175	64	10	8	5.8	9.6	4.6	38	26	64	2	2	1	3	1	4	0	2	4	2	0	2	2	2	2	2	31
25	M	20	185	67	10	8	7.8	5.8	8	39.6	24	63.6	2	2	1	1	1	4	0	2	4	1	2	2	2	2	2	0	28
26	M	21	180	68	10	8	6	5.2	6.4	35.6	28	63.6	2	2	1	3	1	4	0	0	4	2	0	2	2	2	2	2	29
27	M	21	182	85	8	8	5.8	8.6	7	37.4	26	63.4	1	0	0	1	0	0	0	2	2	0	0	2	2	2	2	2	16
28	F	20	167	65	10	10	1.4	9.4	6	36.8	26	62.8	2	2	1	3	1	2	0	2	4	2	2	2	2	2	2	2	31
29	M	22	175	70	8	10	3.8	9.2	5.4	36.4	26	62.4	1	2	1	3	1	2	0	2	4	2	0	2	2	2	2	2	28
30	M	21	172	64	10	10	3.4	8.8	7.8	40	22	62	1	0	1	0	0	2	0	2	4	0	0	2	2	2	0	0	16
31	F	21	162	65	10	8	3.6	8.8	5.4	35.8	26	61.8	1	2	1	3	1	2	2	2	4	2	0	2	2	2	2	2	30
32	M	21	165	60	8	4	9.8	8.4	5.4	35.6	26	61.6	2	0	1	3	1	2	0	2	4	2	0	2	0	2	2	2	25
33	F	19	168	60	10	10	8.6	5.4	4.8	38.8	22	60.8	2	2	1	3	1	4	0	2	4	2	1	2	2	2	0	0	28
34	M	20	174	70	10	6	8	8.8	3.6	36.4	24	60.4	1	2	0	3	1	0	0	2	4	0	0	1	2	2	0	0	18
35	M	20	173	69	10	8	3	9.6	3	33.6	26	59.6	2	0	1	1	1	0	0	2	4	2	0	2	2	2	2	2	23
36	F	21	160	50	10	8	3.4	9.6	3.2	34.2	24	58.2	2	2	0	1	1	2	0	2	2	2	0	0	2	2	2	2	22
37	F	20	163	65	8	6	5.6	7	6.8	33.4	24	57.4	2	2	1	3	1	2	0	2	4	2	0	0	2	2	2	2	27
38	M	21	178	80	10	6	0	9.4	8	33.4	24	57.4	2	2	0	3	1	0	1	2	4	2	1	2	2	2	0	0	24
39	M	22	178	75	10	8	0	5.4	5.8	29.2	28	57.2	2	1	1	3	0	2	0	0	4	2	0	1	2	2	2	2	24
40	M	22	178	57	10	6	6.8	5	4.6	32.4	24	56.4	2	2	1	3	1	2	0	2	4	2	0	2	2	2	2	2	29
41	M	20	175	74	10	8	8	4.6	6.8	37.4	18	55.4	1	1	1	2	1	2	0	2	4	1	0	0	0	2	0	0	17
42	M	21	184	80	6	6	7.8	4	7.2	31	24	55	1	1	0	3	1	4	0	2	4	2	0	2	1	2	2	2	27
43	M	20	178	75	10	0	6.8	8.2	7.4	32.4	22	54.4	1	2	1	3	1	0	0	2	4	2	1	2	2	2	0	0	23
44	M	21	173	60	6	8	5.2	8.8	1.4	29.4	24	53.4	2	0	1	1	1	4	1	2	4	2	0	2	2	2	2	2	28
45	M	21	183	68	8	8	0	8.6	2.6	27.2	26	53.2	2	2	1	1	1	4	0	2	4	2	0	0	2	2	2	2	27
46	M	21	195	87	6	6	4	7.4	7.6	31	22	53	1	0	0	0	1	2	0	2	2	2	0	2	2	2	1	2	19
47	M	19	175	68	10	10	3.6	6.8	4	34.4	18	52.4	1	1	0	1	1	2	0	2	4	2	1	2	2	2	0	0	21
48	M	22	187	92	10	8	3.8	8.8	7.2	37.8	14	51.8	1	1	0	1	0	0	0	2	4	1	0	2	2	2	2	2	20
49	F	19	167	55	10	4	3.8	6.6	4.2	28.6	22	50.6	2	0	0	1	1	2	0	2	4	2	0	2	2	2	2	2	24
50	F	23	164	57	4	10	8.4	4	4.4	30.8	18	48.8	1	0	0	3	1	4	0	2	4	2	0	2	2	2	2	2	27
51	M	20	191	70	6	2	3.8	8.4	5.2	25.4	22	47.4	1	2	1	1	1	2	0	0	2	1	1	2	1	2	0	0	17
52	F	21	165	58	10	6	4.6	7	1.2	28.8	18	46.8	1	0	1	1	1	4	0	2	4	2	0	2	2	2	2	2	26
53	M	20	165	60	10	4	1.2	6.6	6.8	28.6	18	46.6	1	0	0	1	0	2	0	2	2	0	0	2	2	2	0	0	14
54	M	20	172	58	10	4	2	8.6	7	31.6	14	45.6	1	2	1	1	1	4	0	2	4	2	0	2	2	2	0	0	24
55	M	19	179	84	6	6	5.4	5.4	3.2	26	18	44	3	0	0	3	1	2	0	2	2	2	0	1	2	2	2	2	24
56	M	22	186	93	10	4	0	2.6	2.6	19.2	8	27.2	1	1	1	1	0	4	0	2	2	0	0	2	2	2	0	0	18
